## The autophagy process

Sushil Devkota

A day in the life of a cell,  
There are so many stories to tell.

Ribosomes are cooking proteins,  
It smells delicious in cells kitchen;  
The beauty of the genetic code,  
Is inside the Nucleus laid hidden.

Kinases are busy kissing proteins,  
They leave the lip mark of phosphate on them;  
Phosphatases are running here and there with  
jealousy,  
Removing phosphate is their game.

Of all these stories inside a cell,  
Those are required to keep the cell neat;  
This is the story of autophagy,  
The process by which cells 'self-eat'.

When there is dark everywhere,  
And not enough food on the table;  
When cells feel unstable,  
And bacteria, viruses, and oncogenes prevail.

A glimmer of hope emanates in the cytosol,  
Wearing the double membranous veil;  
'So do not fear' Autophagy roars,  
'I declare war against adversities and will prevail'.

Collecting intelligence cues from diverse signaling,  
Autophagy breaks shackles of mTOR;  
ULKs and Class III PI3K complex next join the war,  
The first battalion is formed at the phagophore.

Mimicking the Ubiquitin system,  
ATG5-ATG12-ATG16 then join the noble cause;  
This war is about 'to be or not to be',  
There is no excuse for rest or a pause.

Final reinforcement of LC3,  
Ultimately decorates the lipid bilayer;  
The membrane is going to form a circle,  
Engulfed materials will soon disappear.

Nevertheless, like in any war,  
Autophagy complains-'Rumors were spread against  
me';  
'Autophagy is brutal'-it was told,  
Engulfs and kills targets indiscriminately'.

Alas, they did not know,  
Autophagy can be very selective;  
Autophagy receptors p62 or NBR1,  
Perform the selective autophagy trick.

Mitophagy for mitochondria, lipophagy for lipids,  
And pexophagy for the peroxisomes;  
There are many secrets of autophagy hidden,  
Those are yet to be known.

Autophagosome dumps the cargo on the lysosome,  
An organelle full of protease knife;  
All the contents are then chopped to be recycled,  
Executing the beautiful 'art-of-life'.

This is the story of Autophagy,  
Keeping the cell clean its ultimate motive;  
Autophagosome ends its life in the lysosome,  
But the cell continues to live.

*Sushil Devkota*: Section of Cell and Developmental  
Biology, University of California, San Diego, La Jolla, CA,  
USA

**Correspondence to:** *Sushil Devkota*, **email** [sdevkota@ucsd.edu](mailto:sdevkota@ucsd.edu)

**Keywords:** autophagy, lysosome, molecular-signaling, pro-  
tein-degradation

**Received:** February 22, 2017

**Published:** March 07, 2017
